# Supplementary material
Source: PubMed Central journal article supplement (PMC2666038)

**A**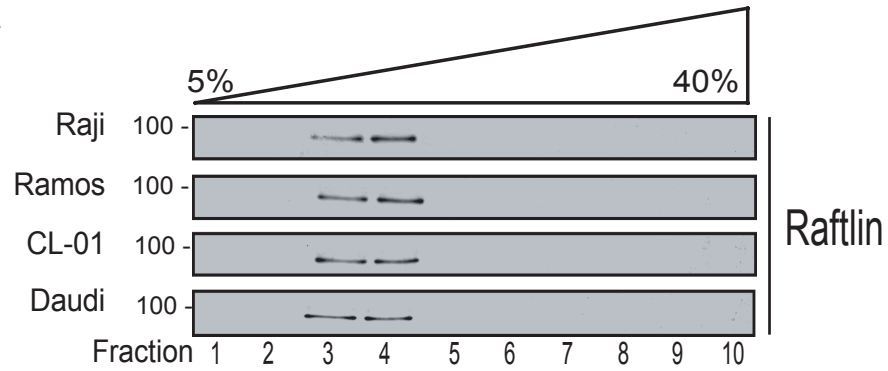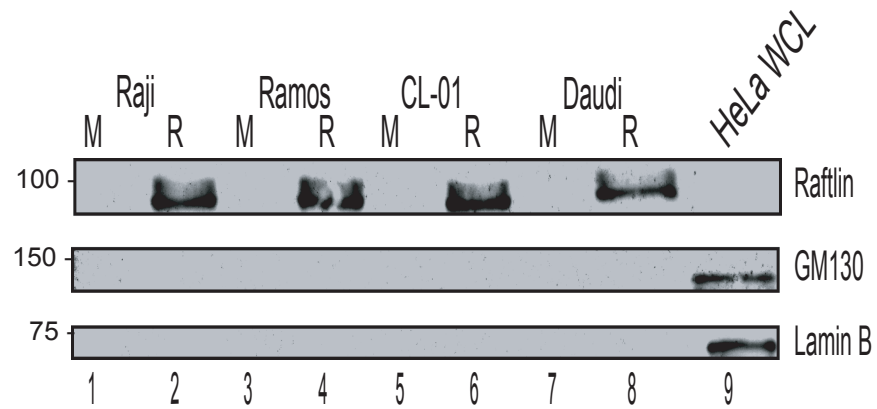**B**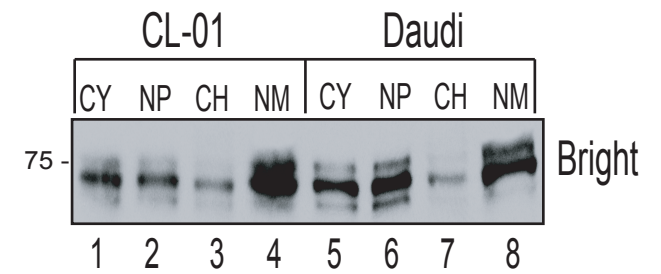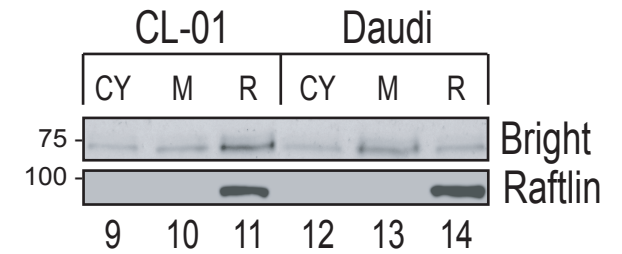

Supplement: emboj200920s3.pdf [file emboj200920s3.pdf]

# Bright interacts with PIAS1 and Ubc9

A

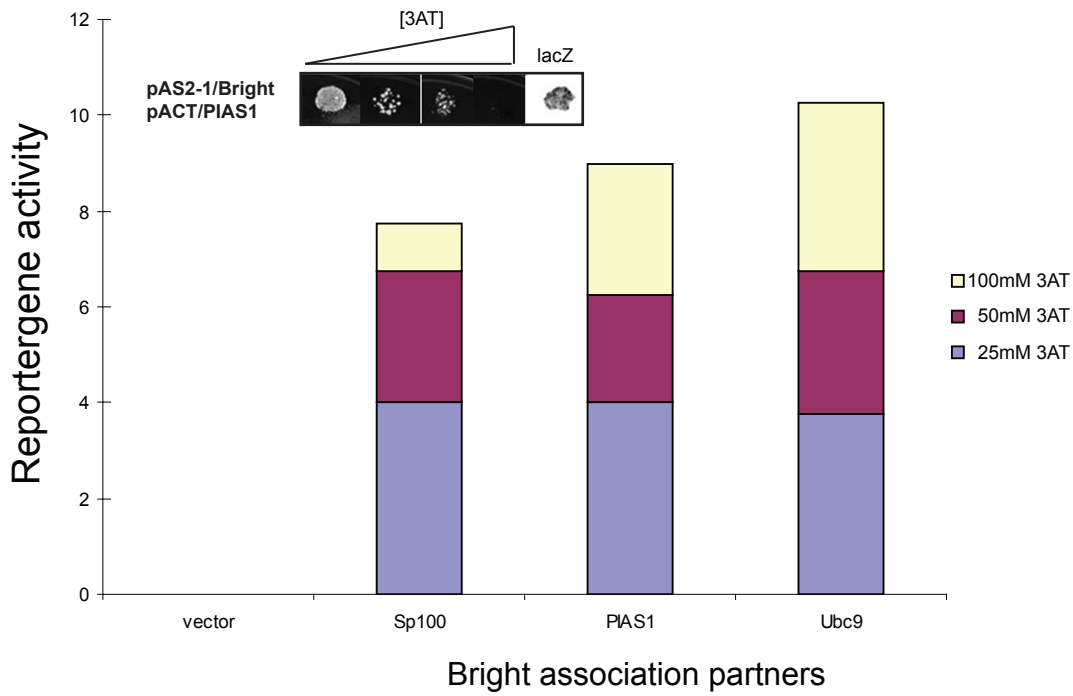

B

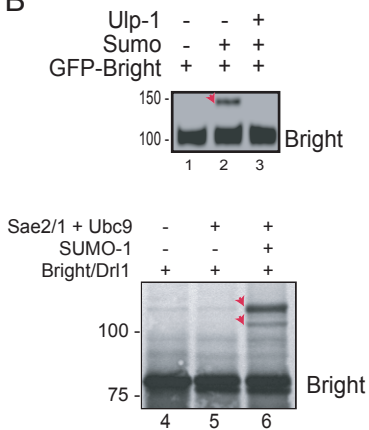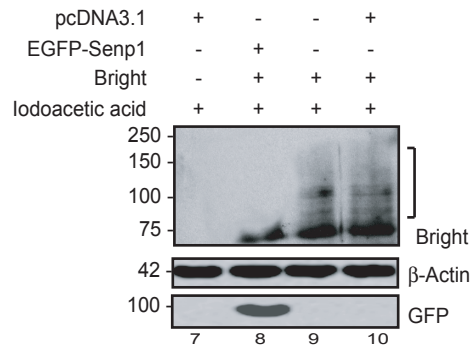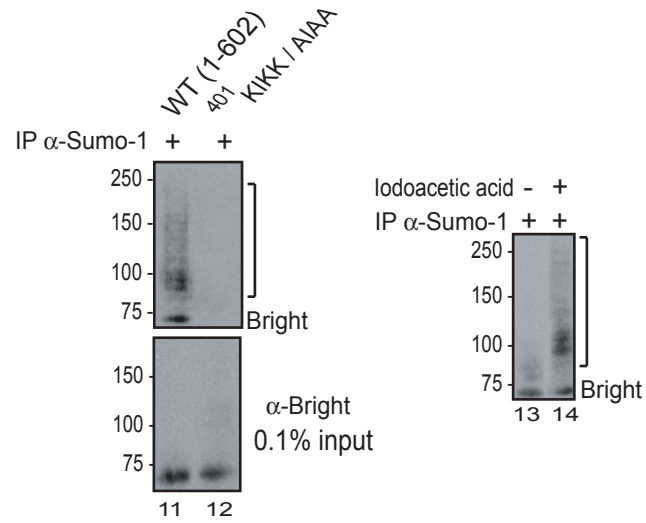

C

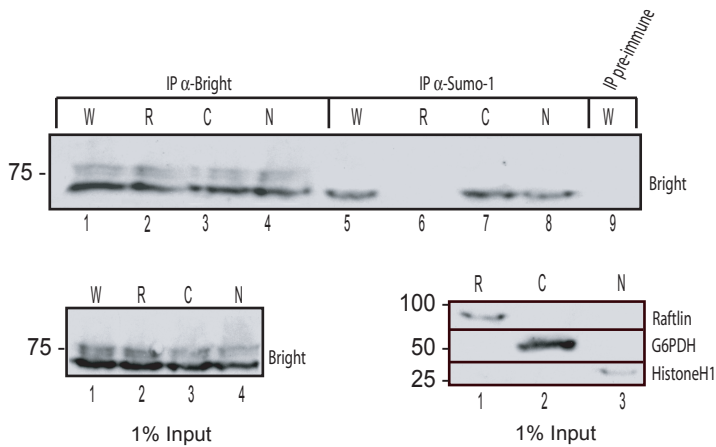

D

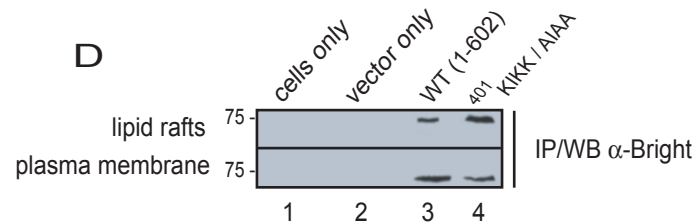

Supplement: emboj200920s5.pdf [file emboj200920s5.pdf]

A

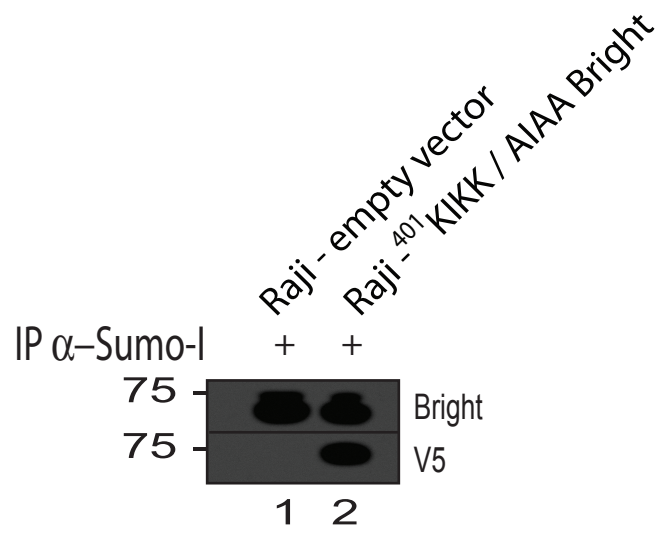

B

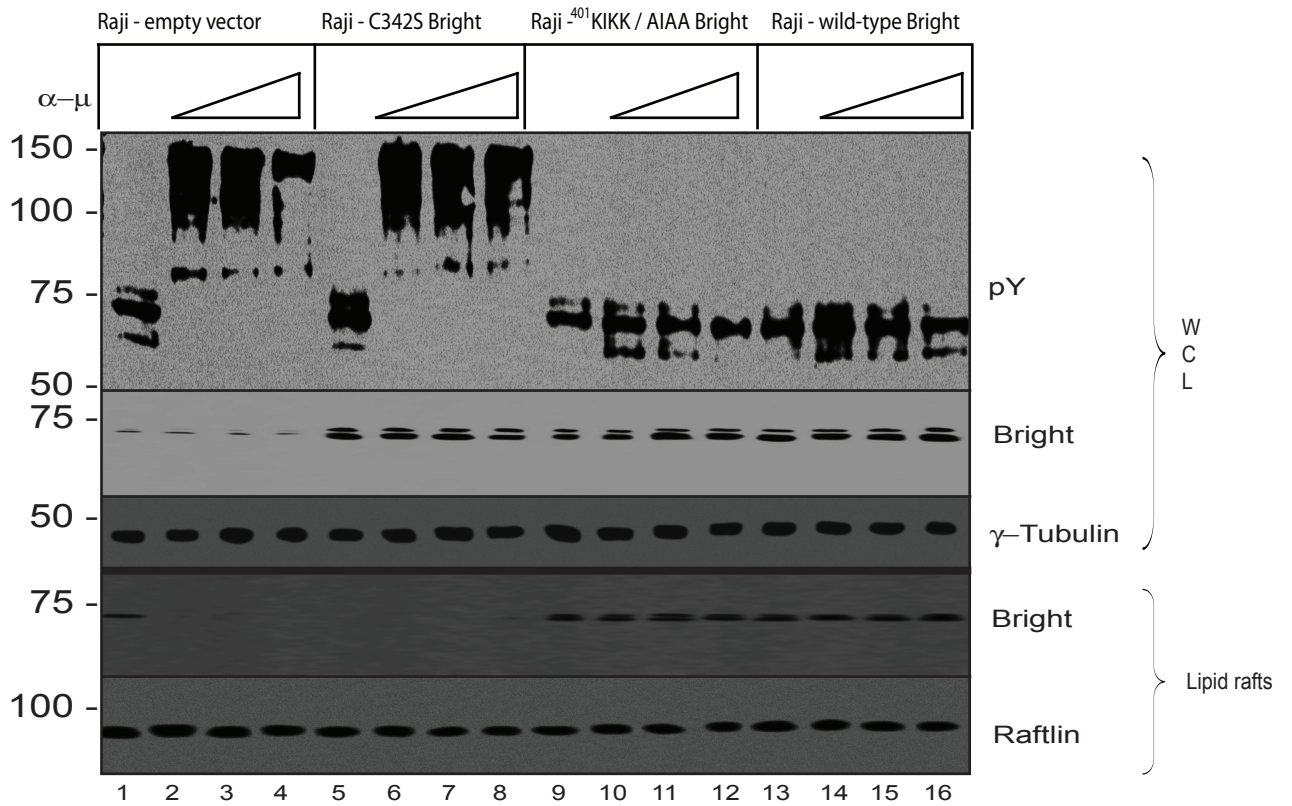

Supplement: emboj200920s6.pdf [file emboj200920s6.pdf]

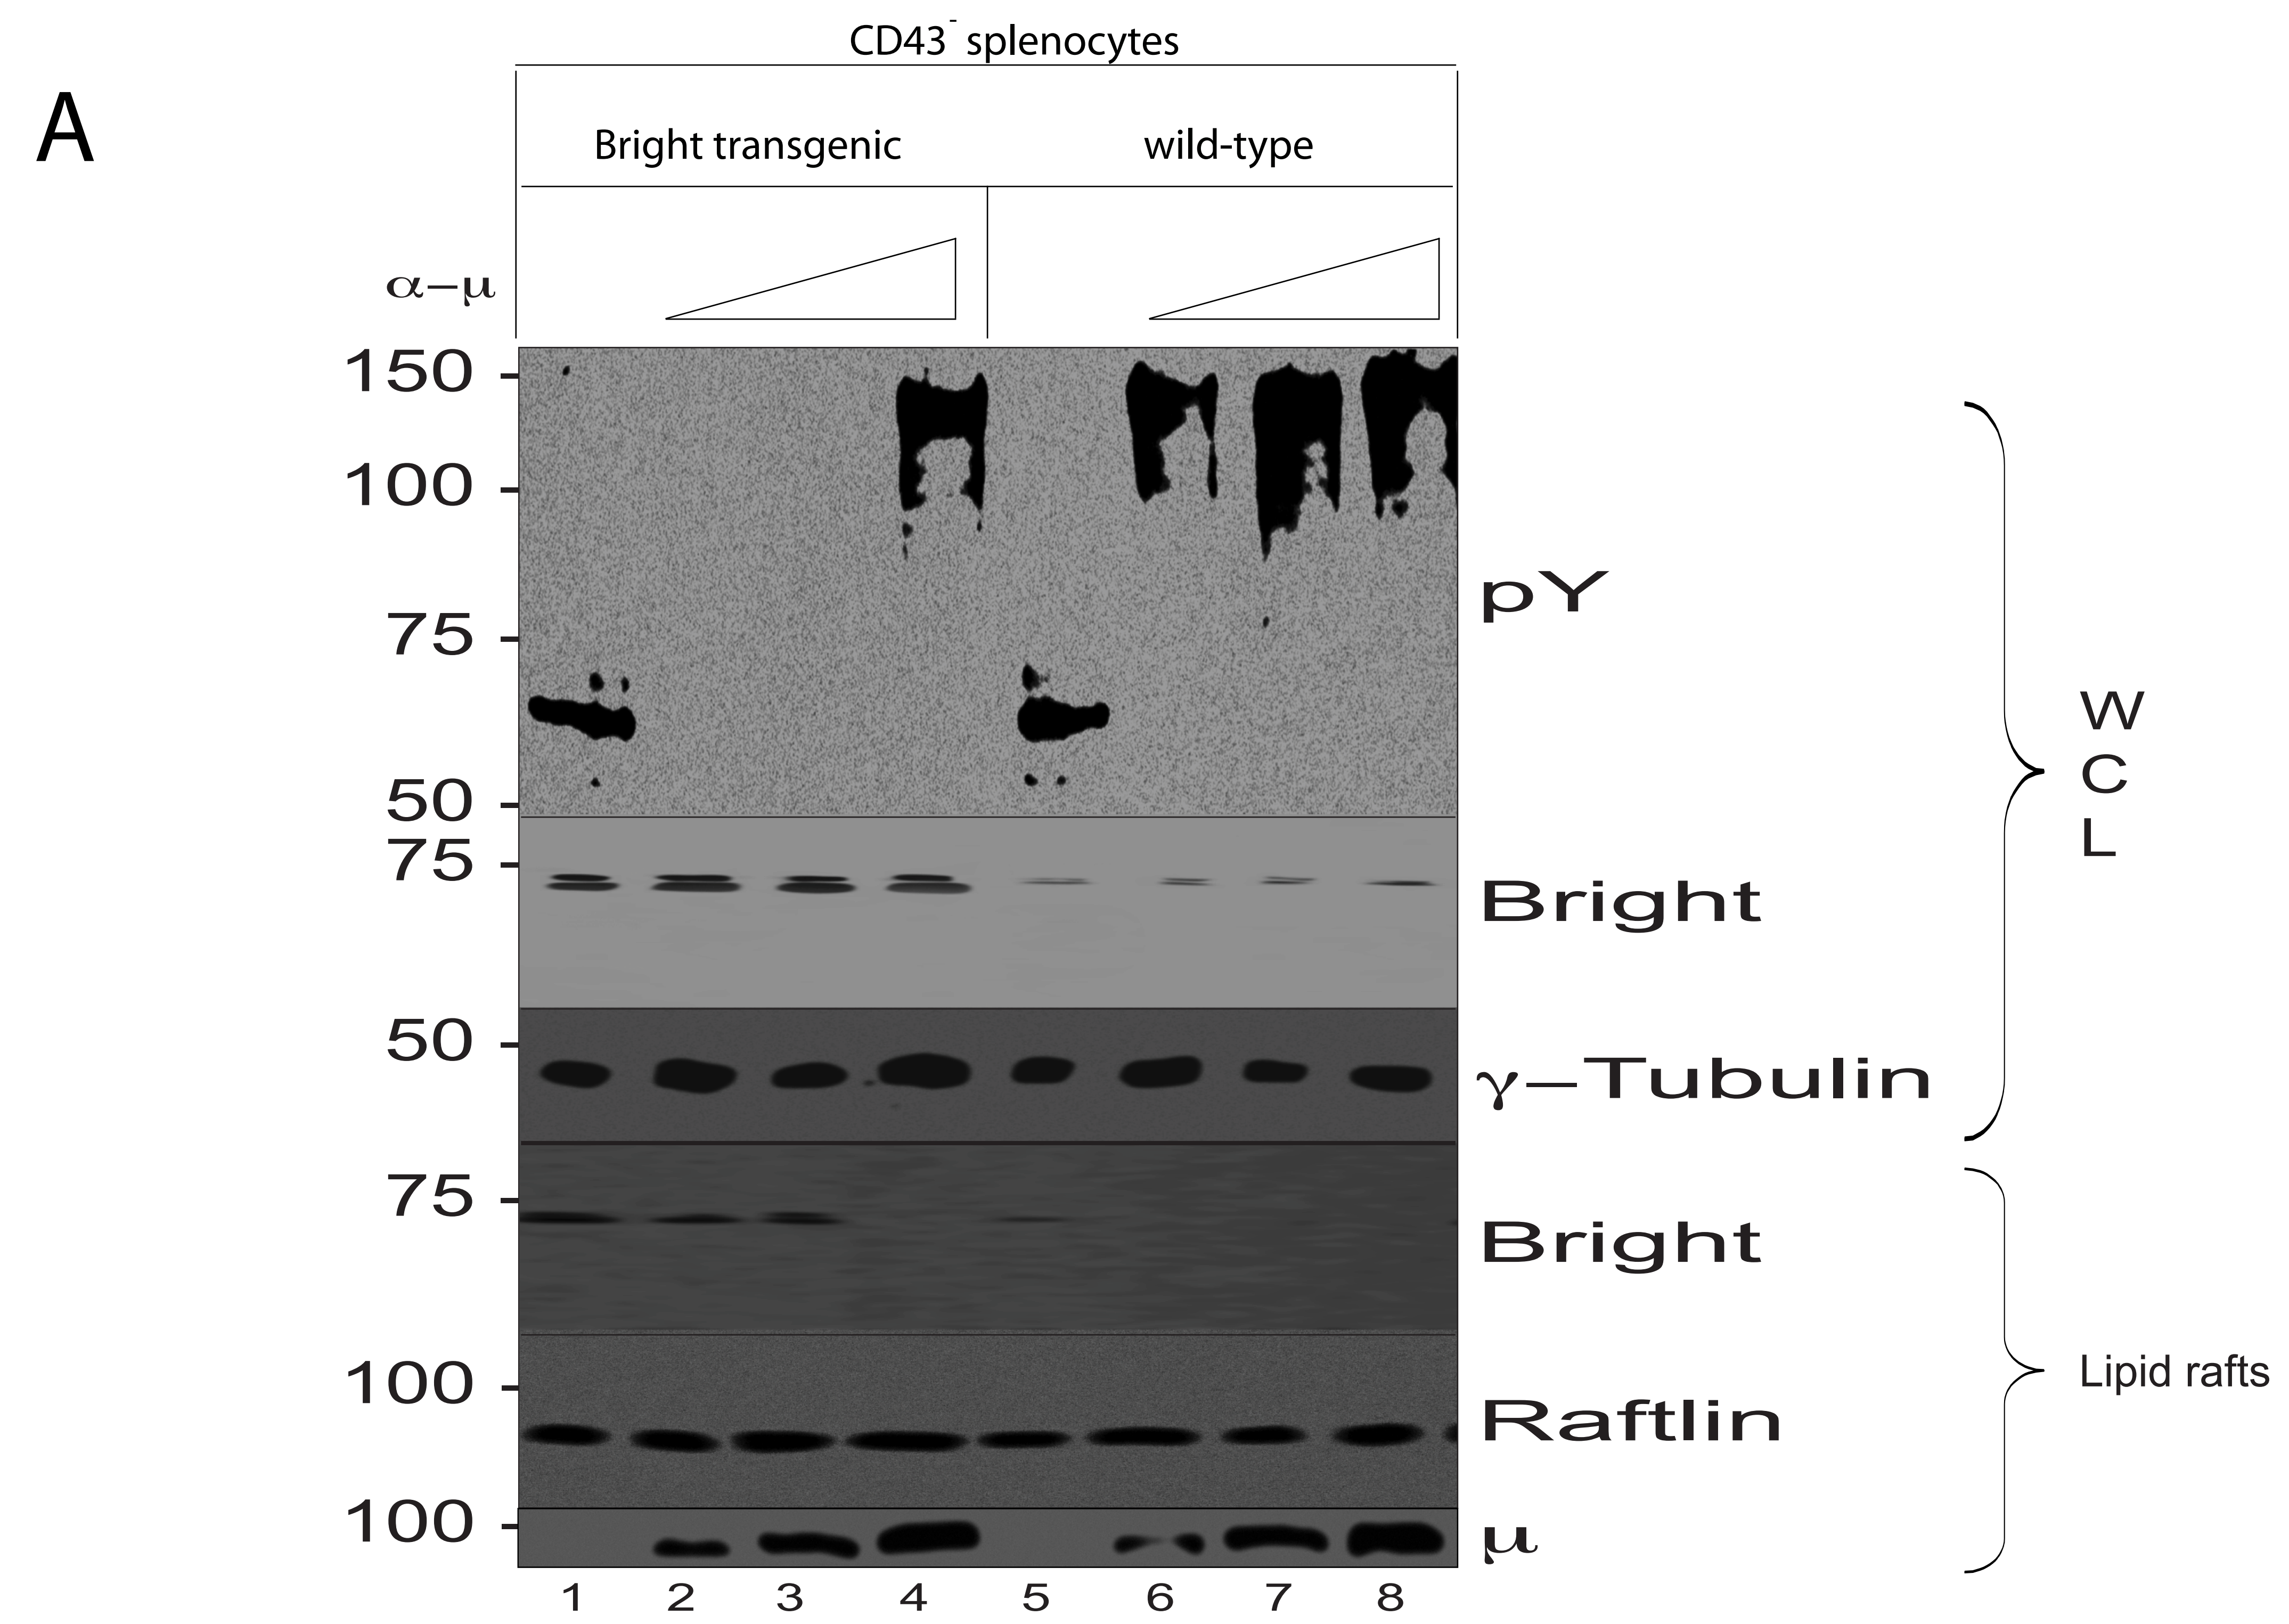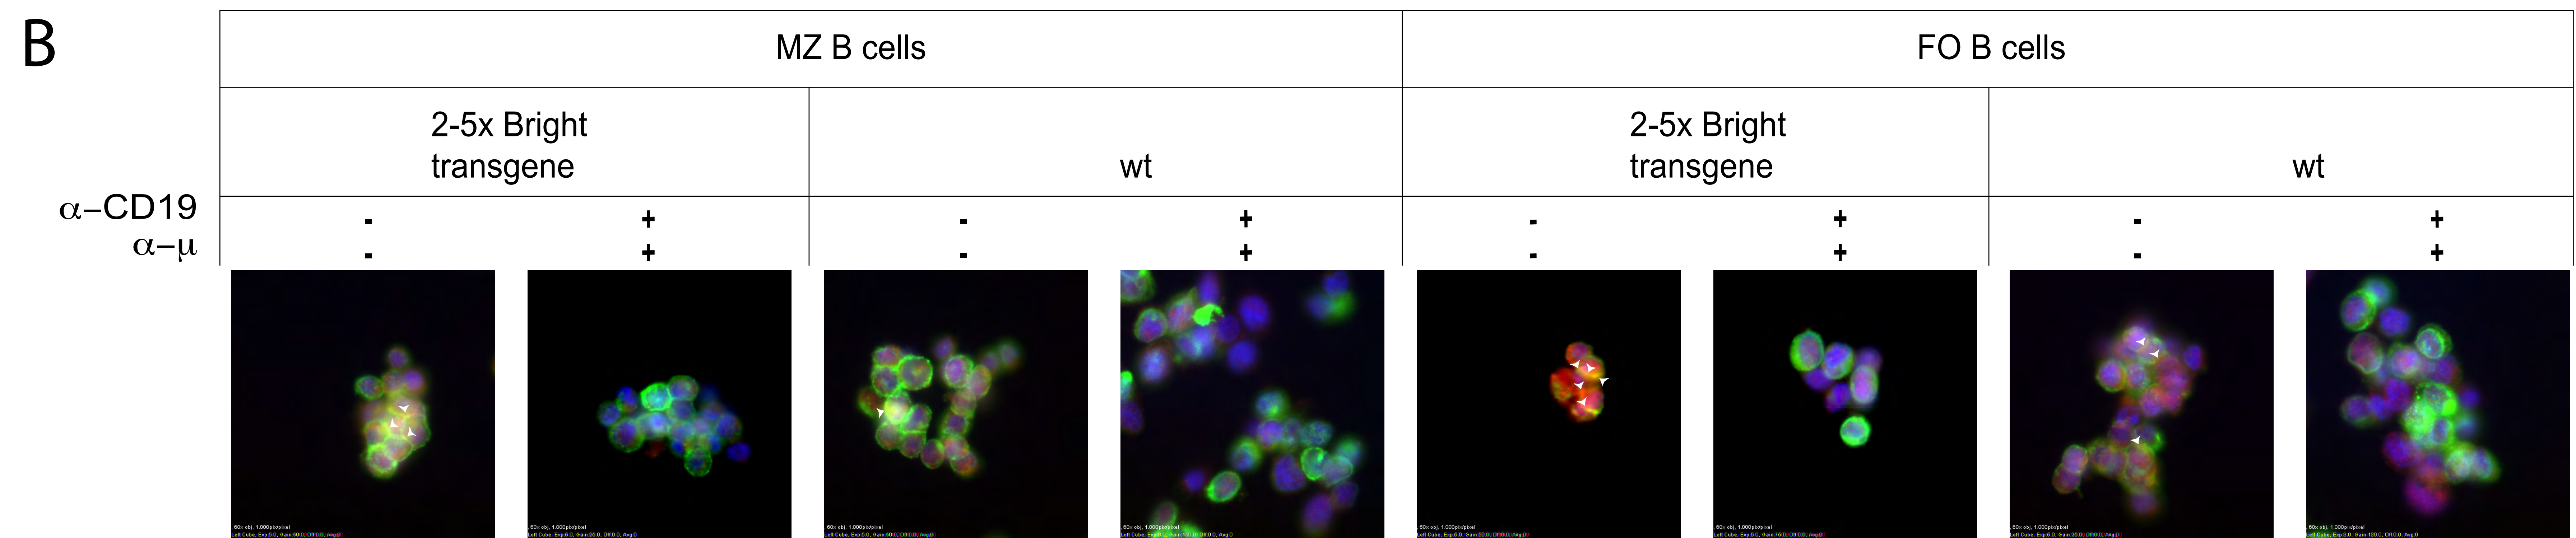

Supplement: emboj200920s7.pdf [file emboj200920s7.pdf]
